# Supplementary material for: Use of recombinant porcine β-defensin 2 as a medicated feed additive for weaned piglets
Source: PubMed Central journal article supplement (PMC4880912; doi:10.1038/srep26790), 2016-05-26
Supplement: srep26790-s1.pdf [file srep26790-s1.pdf]

**Use of recombinant porcine  $\beta$ -defensin 2 as a medicated feed  
additive for weaned piglets**

Zixin Peng<sup>1,3</sup>, Anru Wang<sup>3</sup>, Linqi Xie<sup>3</sup>, Weiping Song<sup>3</sup>, Jie Wang<sup>2</sup>, Zhe Yin<sup>2</sup>,  
Dongsheng Zhou<sup>2,\*</sup> & Fengqin Li<sup>1,\*</sup>

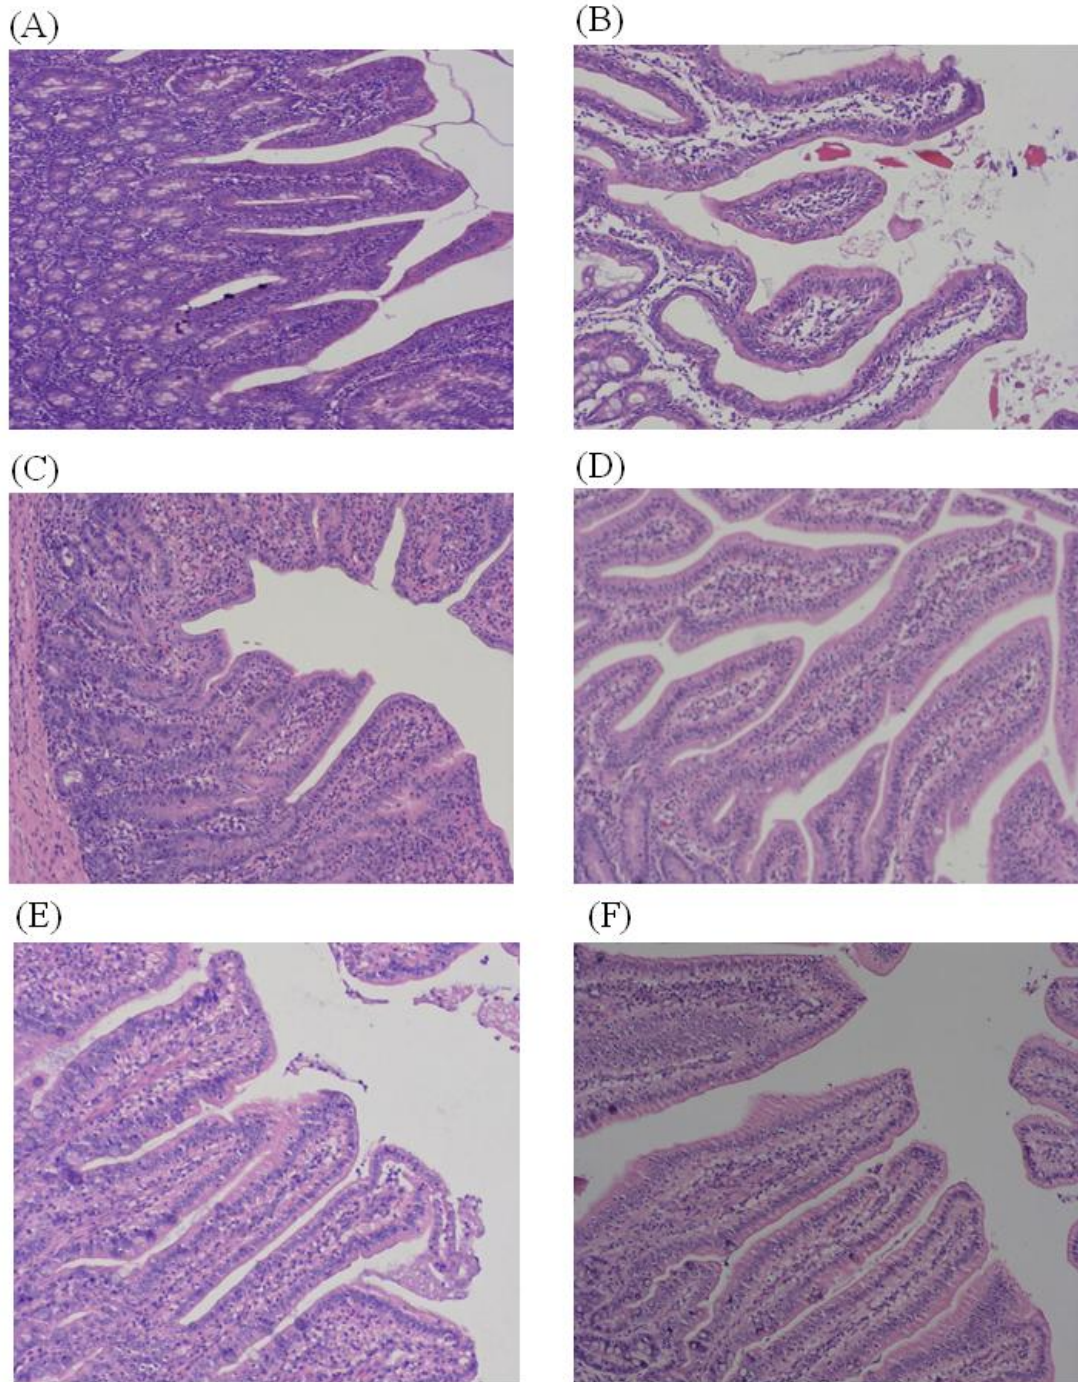

**Supplementary Fig S1. Representative micrographs of small intestinal morphology in weaned piglets (28 days).** (A) and (B) are duodenum morphology of PC and 5PD, respectively; (C) and (D) are jejunum morphology of PC and 5PD, respectively; (E) and (F) are ileum morphology of PC and 5PD, respectively.
